# Supplementary material
Source: publisher site journal article supplement (https://study.sagepub.com/sites/default/files/13%20Bloomberg%203e%20Appendix%20V.pdf)
Supplement: Supplementary file 1 [file 13%20Bloomberg%203e%20Appendix%20V.pdf]

## Appendix V. Data Summary Table: Finding 2

|       | Name    | What They Needed to Learn |                          |               |
|-------|---------|---------------------------|--------------------------|---------------|
|       |         | Knowledge About Content   | Understanding of Process | Assertiveness |
| 1     | Mollie  | X CI                      | X                        |               |
| 2     | Hank    | X                         |                          |               |
| 3     | Morris  | X CI                      |                          |               |
| 4     | Debbie  |                           | X                        |               |
| 5     | Doris   |                           | X                        |               |
| 6     | Anthony | X                         |                          |               |
| 7     | Anne    |                           | X                        |               |
| 8     | Brent   | X                         |                          |               |
| 9     | Angela  | X                         | X                        | X             |
| 10    | Jane    |                           | X                        |               |
| 11    | Brad    | X                         | X                        |               |
| 12    | Dexter  | X                         |                          |               |
| 13    | Frankie | X                         | X                        |               |
| 14    | Sally   | X                         | X                        |               |
| 15    | Shana   | X CI                      |                          |               |
| 16    | Lin     |                           | X                        | X             |
| 17    | Carin   |                           | X                        |               |
| 18    | Fay     | X                         |                          |               |
| 19    | Connie  | X                         |                          |               |
| 20    | Julia   |                           | X                        |               |
| TOTAL |         | 13 (65%)                  | 12 (60%)                 | 2 (10%)       |

\*CI denotes data obtained from critical incident.
